# Supplementary material
Source: HighWire-hosted journal article supplement (https://jnm.snmjournals.org/highwire/filestream/94225/field_highwire_adjunct_files/0/jnm087940_Supplemental_data.pdf)
Supplement: jnm087940_Supplemental_data.pdf [file jnm087940_Supplemental_data.pdf]

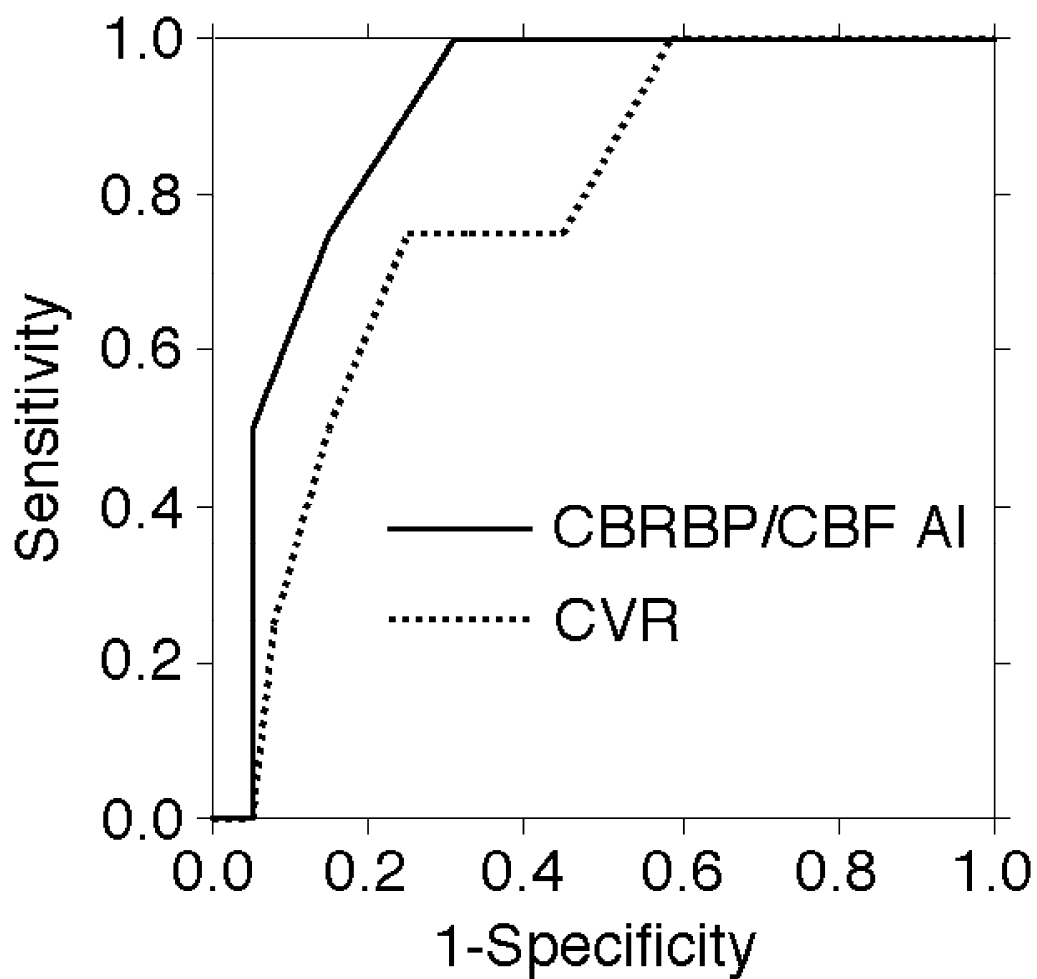

**Supplemental Figure 1.** Receiver operating characteristics curves used to determine the accuracy of CBRBP/CBF AI and the CVR acetazolamide in the prediction of new neurological deficits immediately after surgery.

**Supplemental Table 1** Risk factors for the development of new neurological deficits immediately after surgery.

| Risk factors                                  | New postoperative cerebral ischemic events |              | p Value |
|-----------------------------------------------|--------------------------------------------|--------------|---------|
|                                               | Yes (n = 4)                                | No (n = 108) |         |
| Age (yr) (mean ± SD)                          | 71.8±6.2                                   | 68.6±6.7     | 0.5042  |
| Male gender                                   | 3 (75%)                                    | 102 (94%)    | 0.2303  |
| Hypertension                                  | 10 (91%)                                   | 98 (91%)     | >0.9999 |
| Diabetes mellitus                             | 1 (25%)                                    | 41 (38%)     | >0.9999 |
| Hyperlipidemia                                | 6 (55%)                                    | 55 (54%)     | 0.3288  |
| Symptomatic lesions                           | 4 (100%)                                   | 71 (66%)     | 0.3002  |
| Degree of ICA stenosis (%)<br>(mean ± SD)     | 93.8±2.5                                   | 87.2±8.4     | 0.0672  |
| Duration of ICA clamping (min)<br>(mean ± SD) | 36.0±7.5                                   | 36.1±5.3     | 0.8198  |
| Preoperative CBRBP/CBF AI                     | 109.1±3.1                                  | 102.7±5.7    | 0.0118  |
| Preoperative CVR to acetazolamide (%)         | 17.3±10.4                                  | 27.6±12.8    | 0.0817  |
